# Supplementary material for: Comprehensive research on the solid, liquid, and gaseous products of rice husk and rice straw torrefaction
Source: Royal Society of Chemistry journal article supplement (doi:10.1039/d0se01701a), 2020-12-10
Supplement: d0se01701a1.pdf [file d0se01701a1.pdf]

## **Supplementary Material Cover Sheet**

### **Comprehensive research on the solid, liquid, and gaseous products of rice husk and rice straw torrefaction**

**Chuanshuai Chen, Guozhao Ji, Lan Mu, Yutao Zhang, Aimin Li\***

Key Laboratory of Industrial Ecology and Environmental Engineering, School of  
Environmental Science & Technology, Dalian University of Technology, Dalian,  
116024, PR China

\*Corresponding author.

Email address: [leeam@dlut.edu.cn](mailto:leeam@dlut.edu.cn) (A. Li)

Number of pages: 2

Number of tables: 1

Number of figures: 0

Table S1 Mass and energy balance of torrefaction of rice husk and rice straw. (M: mass unit; E: energy unit).

| Samples   | Energy input (kJ) | Solid    |          | Liquid  |         | Gas     |        |
|-----------|-------------------|----------|----------|---------|---------|---------|--------|
| Raw-RH    | 0.00              | 100.00%M | 100.00%E | 0.00%M  | 0.00%E  | 0.00%M  | 0.00%E |
| 200 °C-RH | 727.20            | 91.17%M  | 98.46%E  | 8.70%M  | 1.54%E  | 0.13%M  | 0.00%E |
| 225 °C-RH | 835.20            | 89.90%M  | 97.29%E  | 9.72%M  | 2.71%E  | 0.38%M  | 0.00%E |
| 250 °C-RH | 973.80            | 84.35%M  | 93.94%E  | 14.65%M | 5.98%E  | 1.00%M  | 0.08%E |
| 275 °C-RH | 1069.20           | 75.93%M  | 86.66%E  | 20.88%M | 12.86%E | 3.19%M  | 0.48%E |
| 300 °C-RH | 1216.80           | 63.43%M  | 77.62%E  | 30.12%M | 21.25%E | 6.44%M  | 1.13%E |
| Raw-RS    | 0.00              | 100.00%M | 100.00%E | 0.00%M  | 0.00%E  | 0.00%M  | 0.00%E |
| 200 °C-RS | 716.40            | 89.60%M  | 95.35%E  | 9.82%M  | 4.65%E  | 0.58%M  | 0.00%E |
| 225 °C-RS | 842.40            | 86.11%M  | 95.78%E  | 12.26%M | 4.10%E  | 1.64%M  | 0.12%E |
| 250 °C-RS | 900.00            | 79.16%M  | 91.39%E  | 17.27%M | 8.12%E  | 3.57%M  | 0.49%E |
| 275 °C-RS | 1069.20           | 69.53%M  | 83.96%E  | 23.86%M | 14.98%E | 6.61%M  | 1.05%E |
| 300 °C-RS | 1188.00           | 52.61%M  | 71.08%E  | 35.51%M | 26.75%E | 11.88%M | 2.18%E |
